# Supplementary material for: Conjugation of antibody with temperature-responsive polymer via in situ click reaction to enable biomarker enrichment for increased diagnostic sensitivity
Source: Royal Society of Chemistry journal article supplement (doi:10.1039/d1bm00349f), 2021-01-01
Supplement: d1bm00349f1.pdf [file d1bm00349f1.pdf]

## Supplementary information

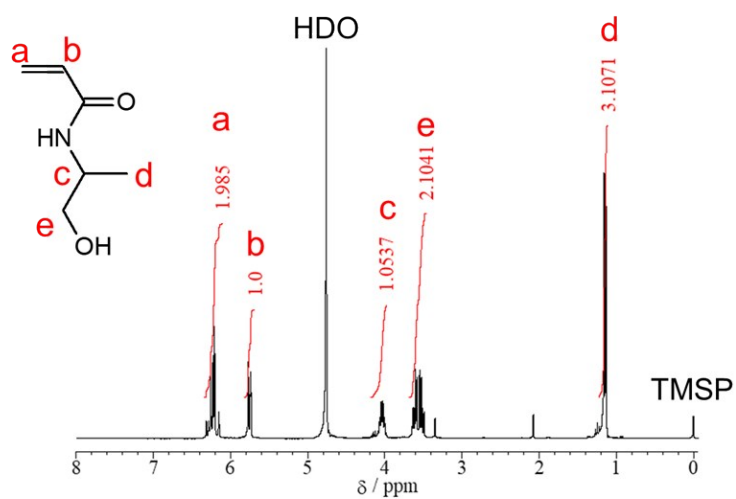

Fig. S1 <sup>1</sup>H-NMR spectrum of HIPAAm in D<sub>2</sub>O containing 0.05 v/v% TMSP.

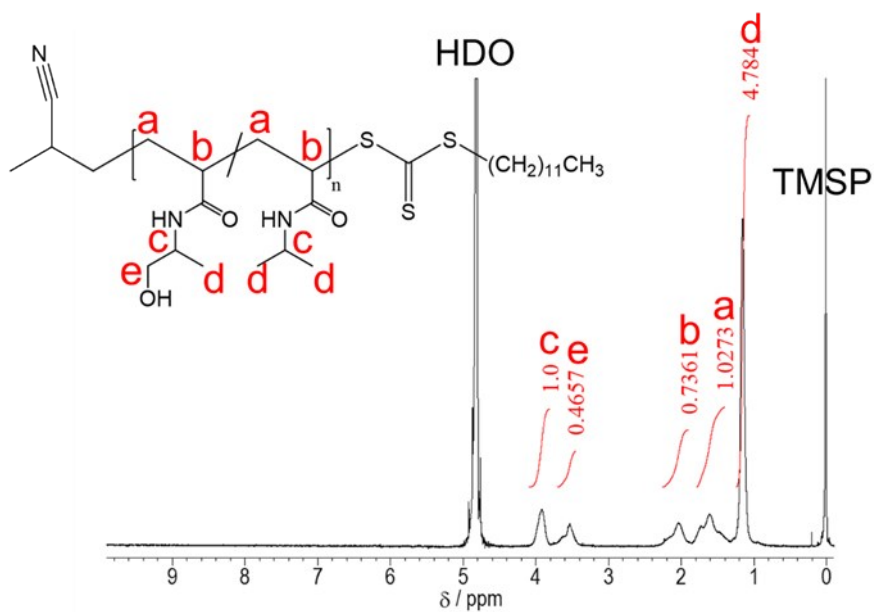

Fig. S2 <sup>1</sup>H-NMR spectrum of P(NIPAAm-co-HIPAAm) in D<sub>2</sub>O containing 0.05 v/v% TMSP.

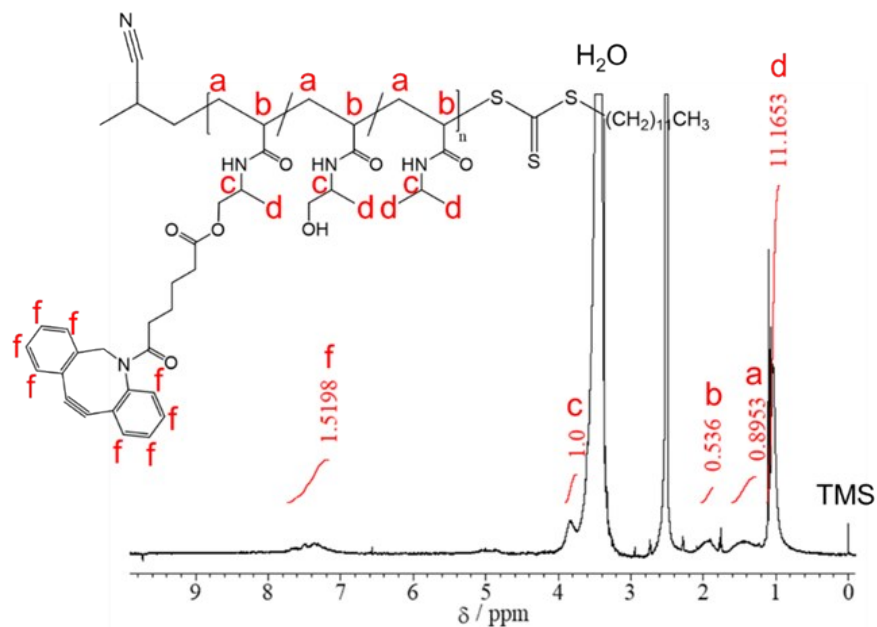

Fig. S3 <sup>1</sup>H-NMR spectrum of P(NIPAAm-co-HIPAAm-co-SAKIPAAm) in DMSO-*d*<sub>6</sub> containing 0.05 v/v% TMS.

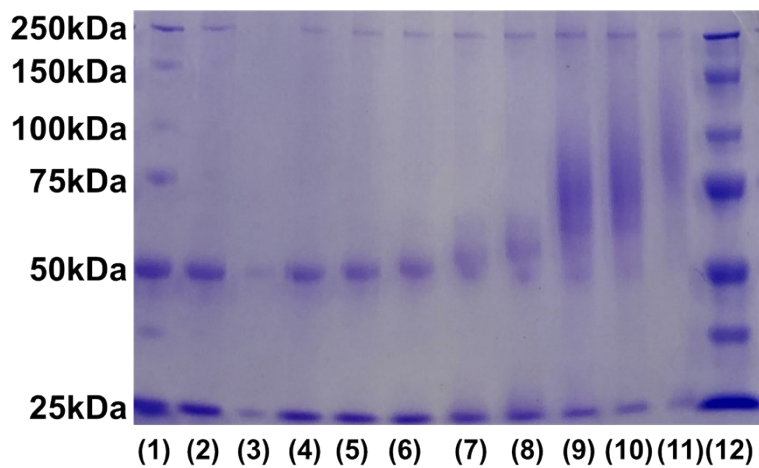

Fig. S4 Click reactions of polymer and several azido-IgG were observed by SDS-PAGE ((1) protein standard (2) IgG (3) azido-IgG (4) azido/IgG = 0.5 (mol/mol) (5) 2.0 (6) 4.3 (7) 5.5 (8) 8.2 (9) 8.5 (10) 10.7 (11) 11.0 (12) protein standard.)

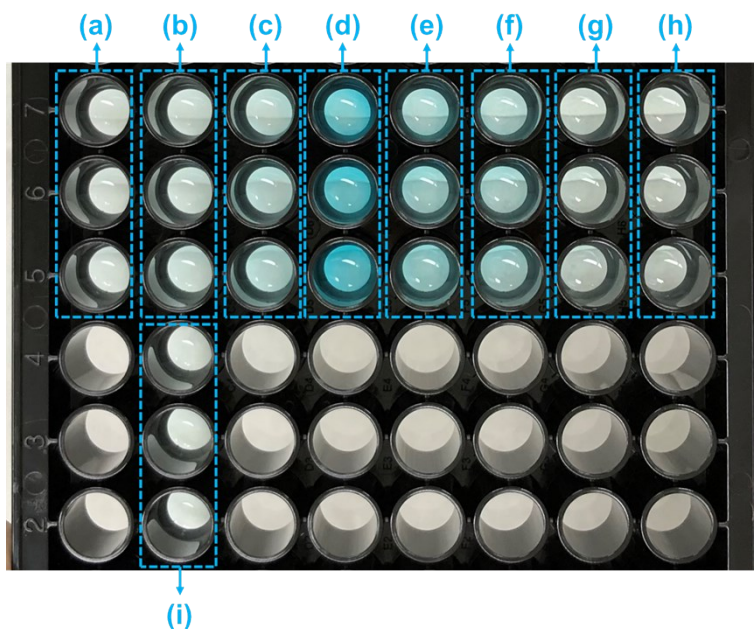

Fig. S5 ELISA plate showing the antigen enrichment estimation after heat precipitation. (a)-(h) showing the antigen enrichment using different IgG-polymer conjugate ratios ((a) azido/IgG = 0.5 (mol/mol) (b) 2.0 (c) 4.3 (d) 5.5 (e) 8.2 (f) 8.5 (g) 10.7 (h) 11.0 and (i) shows the original concentration of antigen.

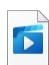

Paper Chromatography\_Movie.MOV

Fig. S6 Antigen visualization by paper chromatography. Antigen was visualized (a) before and (b) after enrichment using paper chromatography. The playback speed of this video was 4x.
